## Patterns of anticoagulation for atrial fibrillation in cancer patients referred for cardio-oncological evaluation

M. Toma<sup>1</sup>, E. Rrapaj<sup>2</sup>, S. Giovino<sup>1</sup>, M. Sarocchi<sup>1</sup>, G. Stronati<sup>2</sup>, A. Dello Russo<sup>2</sup>, I. Porto<sup>3</sup>, P. Spallarossa<sup>1</sup>, F. Guerra<sup>2</sup>, P. Ameri<sup>3</sup>

<sup>1</sup>IRCCS Policlinic San Martino, Genoa, Italy; <sup>2</sup>University Hospital Riuniti of Ancona, Cardiology and Arrhythmology Clinic, Ancona, Italy; <sup>3</sup>University of Genova, Department of Internal Medicine, Genoa, Italy

**Funding Acknowledgement:** Type of funding source: None

**Background:** Direct oral anticoagulants (DOAC) are the standard of care for the prophylaxis of non-valvular atrial fibrillation (NVAF)-cardioembolism, but their use in oncological patients has been limited so far.

**Methods:** We retrospectively reviewed the records of the patients referred to two cardio-oncology outpatient units between January 2017 and July 2019, and selected those presenting with NVAF, CHA<sub>2</sub>DS<sub>2</sub>-VASc  $\geq 1$  for men and  $\geq 2$  for women, and cancer on active treatment. The following were considered as contraindications to DOAC: severe chronic kidney disease; anti-neoplastic therapy unknown or with potential moderate-to-severe adverse interactions; cirrhosis or liver metastases. Clinical characteristics of patients on DOAC (group 1), on VKA or LMWH with at least 1 contraindication to DOAC (group 2), and on VKA or LMWH despite not having contraindications to DOAC (group 3) were compared by chi-square or ANOVA.

**Results:** Of a total of 3,831 patients, 264 (6.9%) met the inclusion criteria

(Figure 1). One-hundred fourteen (43.2%) were in group 1, 61 (23.1%) in group 2 (18 on VKA, 43 on LMWH), and 65 (24.6%) in group 3 (27 on VKA, 38 on LMWH). Anticoagulation was omitted in 24 (9.1%) cases for various reasons: spontaneous bleeding (5), anaemia and/or thrombocytopenia (5), frailty (4), CHA<sub>2</sub>DS<sub>2</sub>-VASc 1 (3), pharmacological interactions (1), single episode of NVAF (1); and not clearly motivated in 5 subjects.

The only significant difference between the 3 groups was serum creatinine concentration (Table 1). Of note, only 10% of subjects in group 1 received an inappropriate DOAC dose, while LMWH was under-dosed for 18% of patients in group 2 and 31% of patients in group 3 (P=0.002).

**Conclusions:** In the setting of a dedicated cardio-oncology consultation, DOAC and VKA are most often appropriately prescribed to cancer patients with NVAF. However, there is residual use of LMWH, not infrequently at non-anticoagulant dosage. This is a non-evidence based common practice in clinical oncology that clearly must be abandoned

Table 1. Principal baseline characteristics

|                                        | Group 1 (N=114) | Group 2 (N=62) | Group 3 (N=65) | P      |
|----------------------------------------|-----------------|----------------|----------------|--------|
| Age, years                             | 75±8            | 74±8           | 74±7           | 0.35   |
| Males                                  | 67 (59)         | 44 (72)        | 44 (68)        | 0.18   |
| Advanced cancer                        | 64 (56)         | 36 (59)        | 30 (46)        | 0.17   |
| CHA <sub>2</sub> DS <sub>2</sub> -VASc | 3.59±1.28       | 3.26±1.26      | 3.37±1.22      | 0.23   |
| HAS-BLED                               | 1.67±0.84       | 1.64±0.78      | 1.88±0.82      | 0.18   |
| Haemoglobin, g/dL                      | 12.35±1.85      | 12.03±1.94     | 12.16±1.90     | 0.57   |
| Serum creatinine, mg/dL                | 1.03±0.35       | 1.33±0.81      | 1.03±0.24      | <0.001 |

Values are mean ± SD or N (%).

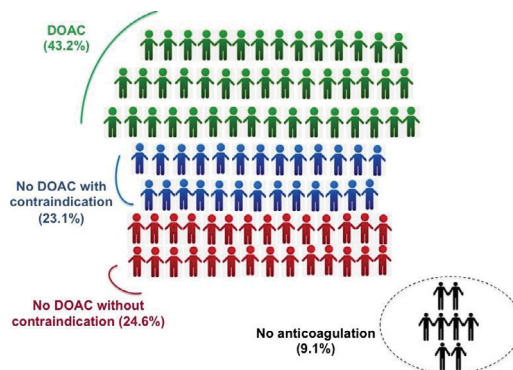

Figure 1
